# Supplementary material for: Engineered extracellular vesicle-based sonotheranostics for dual stimuli-sensitive drug release and photoacoustic imaging-guided chemo-sonodynamic cancer therapy
Source: Theranostics. 2022 Jan 1;12(3):1247–66. doi: 10.7150/thno.65516 (PMC8771566; doi:10.7150/thno.65516)
Supplement: Supplementary file 1 — Supplementary figures and tables. [file thnov12p1247s1.pdf]

## Supporting Information

### **Engineered extracellular vesicle-based sonotheranostics for dual stimuli-sensitive drug release and photoacoustic imaging-guided chemo-sonodynamic cancer therapy**

Thuy Giang Nguyen Cao<sup>1,†</sup>, Ji Hee Kang<sup>2,†</sup>, Wangyu Kim<sup>3,†</sup>, Junha Lim<sup>4,†</sup>, Su Jin Kang<sup>1</sup>, Jae Young You<sup>1</sup>, Quan Truong Hoang<sup>1</sup>, Won Jong Kim<sup>4</sup>, Won Jong Rhee<sup>1,5\*</sup>, Chulhong Kim<sup>3,\*</sup>, Young Tag Ko<sup>2,\*</sup>, Min Suk Shim<sup>1,\*</sup>

<sup>1</sup>Division of Bioengineering, Incheon National University, Incheon 22012, Republic of Korea

<sup>2</sup>College of Pharmacy, Gachon University, Incheon 21936, Republic of Korea

<sup>3</sup>Department of Electrical Engineering, Convergence IT Engineering, and Mechanical Engineering, Medical Device Innovation Center, Pohang University of Science and Technology (POSTECH), Pohang 37673, Republic of Korea

<sup>4</sup>Department of Chemistry, Pohang University of Science and Technology (POSTECH), Pohang 37673, Republic of Korea

<sup>5</sup>Research Center for Bio Materials & Process Development, Incheon National University, 119 Academy-ro, Yeonsu-gu, Incheon 22012, Republic of Korea

[†] These authors contributed equally to this work.

\*Corresponding authors:

Dr. Won Jong Rhee

Tel: +82-32-835-8299; E-mail address: [wjrhee@inu.ac.kr](mailto:wjrhee@inu.ac.kr)

Dr. Chulhong Kim

Tel: +82-54-279-8805; E-mail address: [chulhong@postech.ac.kr](mailto:chulhong@postech.ac.kr)

Dr. Young Tag Ko

Tel: +82-32-820-4923; E-mail address: [youngtakko@gachon.ac.kr](mailto:youngtakko@gachon.ac.kr)

Dr. Min Suk Shim

Tel: +82-32-835-8268; E-mail address: [msshim@inu.ac.kr](mailto:msshim@inu.ac.kr)

**Table S1.** IC<sub>50</sub> values of ICG and PTX in various SBC-EV(ICG/PTX) samples against MCF-7 cells before and after US irradiation.

| Samples                      | ICG (µg/mL)  | PTX (µg/mL) |
|------------------------------|--------------|-------------|
| Free ICG                     | 212.56±9.00  | -           |
| Free ICG + US                | 197.08±10.54 | -           |
| Free PTX                     | -            | 15.95±0.28  |
| Free PTX + US                | -            | 15.16±0.09  |
| SBC-EV(ICG/PTX) (28:2)       | 185.58±3.82  | 13.26±0.27  |
| SBC-EV(ICG/PTX) (28:2) + US  | 174.49±3.74  | 12.46±0.73  |
| SBC-EV(ICG/PTX) (28:4)       | 91.71±0.54   | 12.01±0.25  |
| SBC-EV(ICG/PTX) (28:4) + US  | 75.41±2.23   | 10.78±0.32  |
| SBC-EV(ICG/PTX) (28:10)      | 27.04±0.16   | 9.66±0.06   |
| SBC-EV(ICG/PTX) (28:10) + US | 17.17±0.02   | 6.13±0.01   |
| SBC-EV(ICG/PTX) (28:13)      | 14.22±0.39   | 6.49±0.07   |
| SBC-EV(ICG/PTX) (28:13) + US | 12.99±0.21   | 5.95±0.08   |
| SBC-EV(ICG/PTX) (28:18)      | 9.77±0.07    | 6.27±0.05   |
| SBC-EV(ICG/PTX) (28:18) + US | 9.26±0.27    | 5.81±0.09   |
| SBC-EV(ICG/PTX) (28:22)      | 7.95±0.11    | 6.24±0.09   |
| SBC-EV(ICG/PTX) (28:22) + US | 7.08±0.03    | 5.56±0.02   |

**Table S2.** The area under the plasma concentration-time curve (AUC) of ICG from tumor-bearing mice ( $n = 4$ ) after intravenous injection of free ICG and EV(ICG/PTX) (%ID: percentage of an injected dose).

| Samples     | AUC<br>(%ID·h/mL) |
|-------------|-------------------|
| Free ICG    | 0.7±0.3           |
| EV(ICG/PTX) | 4.0±0.5           |

**Table S3.** qRT-PCR primer sequences.

| Samples | qRT-PCR primers                                                    |
|---------|--------------------------------------------------------------------|
| NOX1    | Forward: GGTTTTACCGCTCCCAGCAGAA<br>Reverse: CTTCCATGCTGAAGCCACGCTT |
| β-actin | Forward: ATGAAGTGTGACGTTGACATCCG<br>Reverse: GCTTGCTGATCCACATCT    |

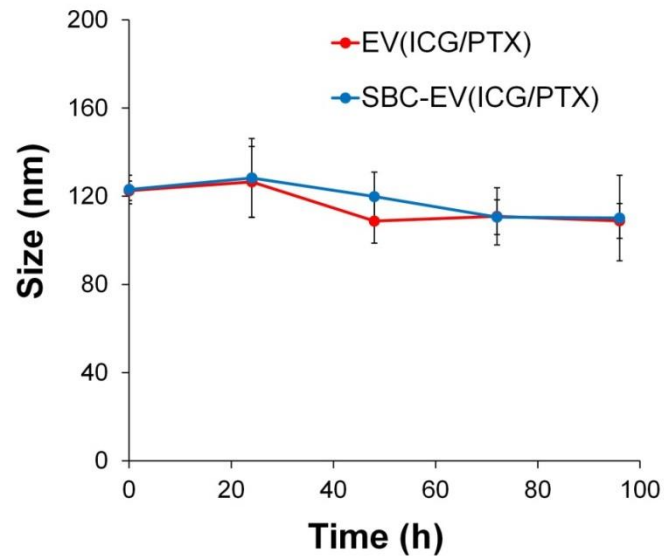

**Figure S1.** Size changes of EV(ICG/PTX) and SBC-EV(ICG/PTX) incubated in 10% FBS-containing PBS for 96 h.

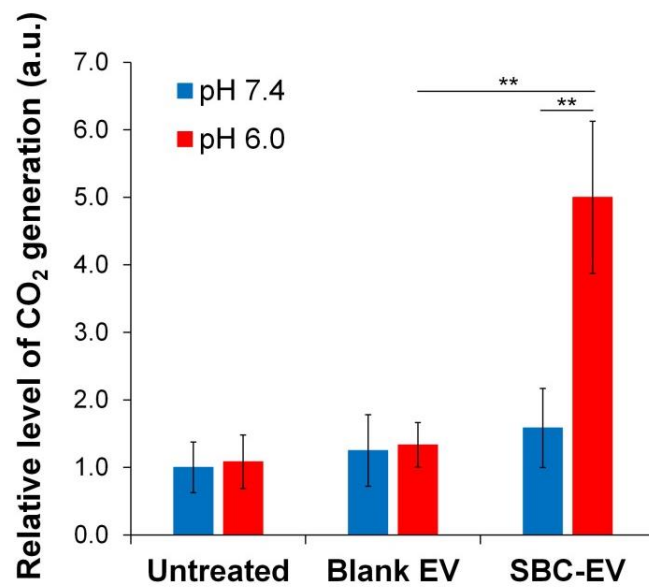

**Figure S2.** Relative levels of CO<sub>2</sub> generation by blank EV and SBC-EV under different pH conditions, determined by an acid-base titration method (\*\* $p < 0.01$ ;  $n = 3$ ).

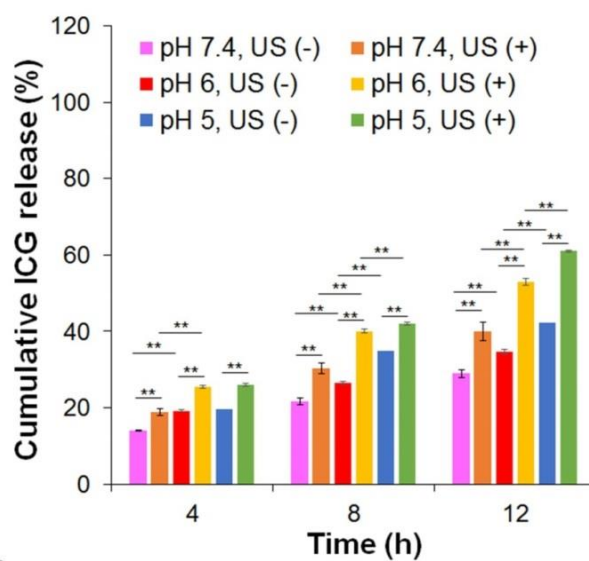

**Figure S3.** ICG release profiles from SBC-EV(ICG/PTX) at different pH and US (1 min of irradiation) conditions (\*\* $p < 0.01$ ;  $n = 3$ ).

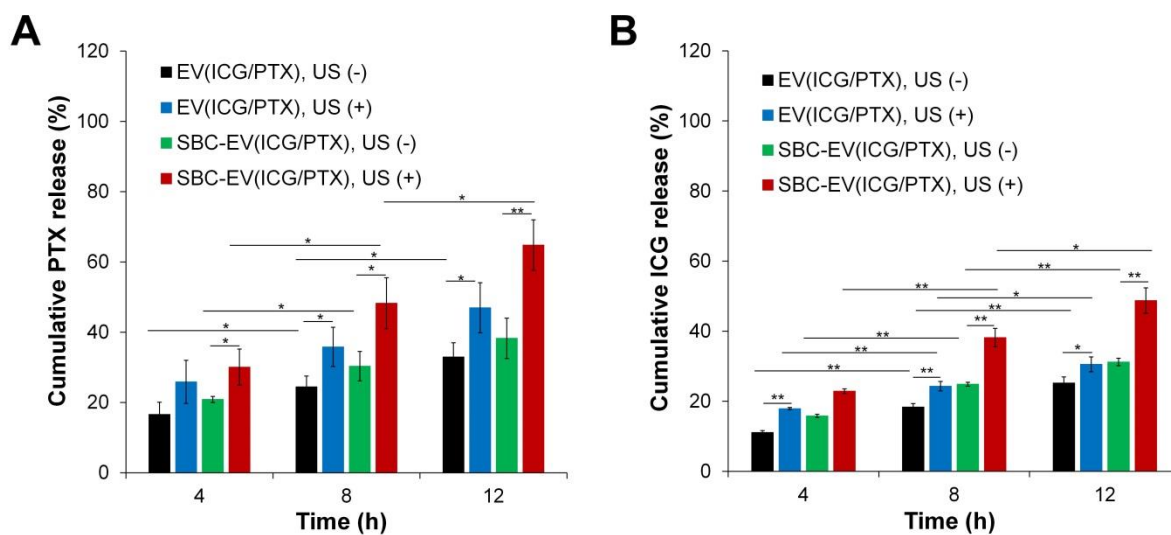

**Figure S4.** Release profiles of PTX and ICG from SBC-EV(ICG/PTX) at pH 6.6 and US (1 min of irradiation) conditions (\* $p < 0.05$ , \*\* $p < 0.01$ ;  $n = 3$ ).

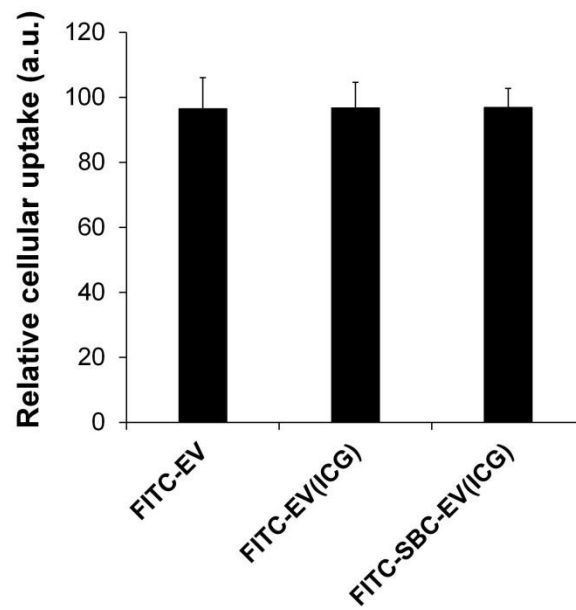

**Figure S5.** Relative cellular uptake of various FITC-labeled EVs by MCF-7 cells after 4 h of incubation.

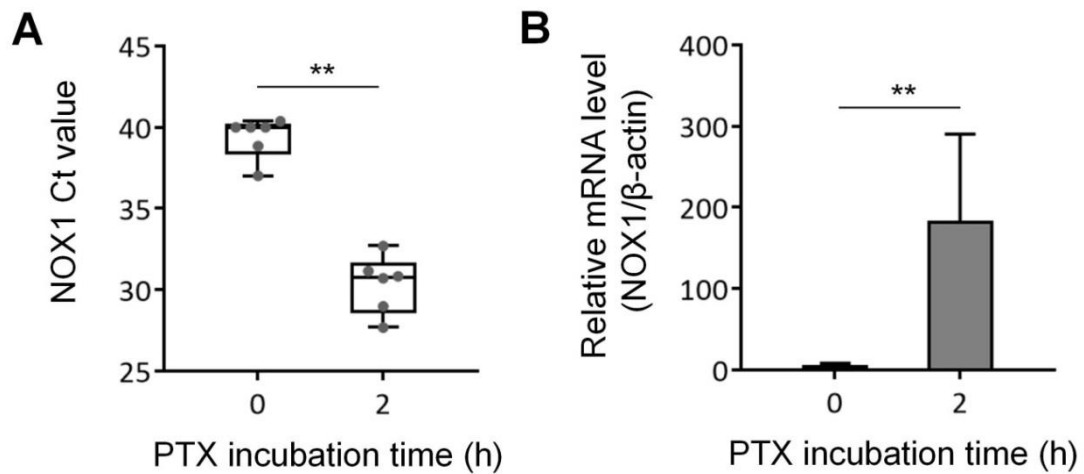

**Figure S6.** The effect of PTX on NOX1 expression in MCF-7 cells. Cycle threshold (Ct) values of NOX1 mRNA (A) and relative NOX1 mRNA expression level (B) in MCF-7 cells after treatment with free PTX were analyzed. \*\* $p < 0.01$  ( $n = 6$ ).

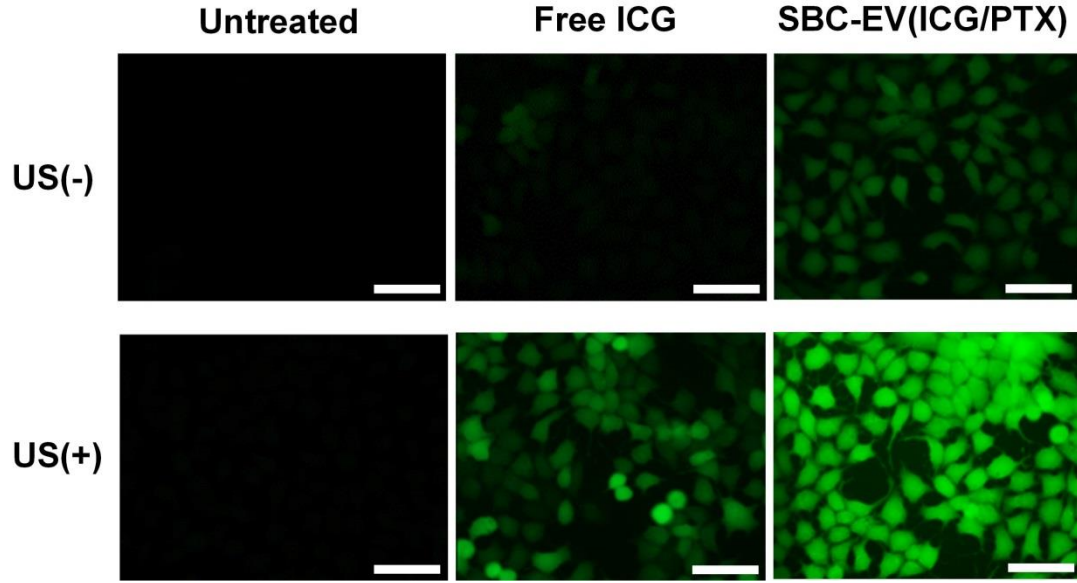

**Figure S7.** Fluorescence images of MCF-7 cells generating intracellular ROS after treatment with free ICG and SBC-EV(ICG/PTX) under US exposure (1 MHz, 0.3 W/cm<sup>2</sup>, 1 min). Scale bars indicate 25  $\mu$ m.

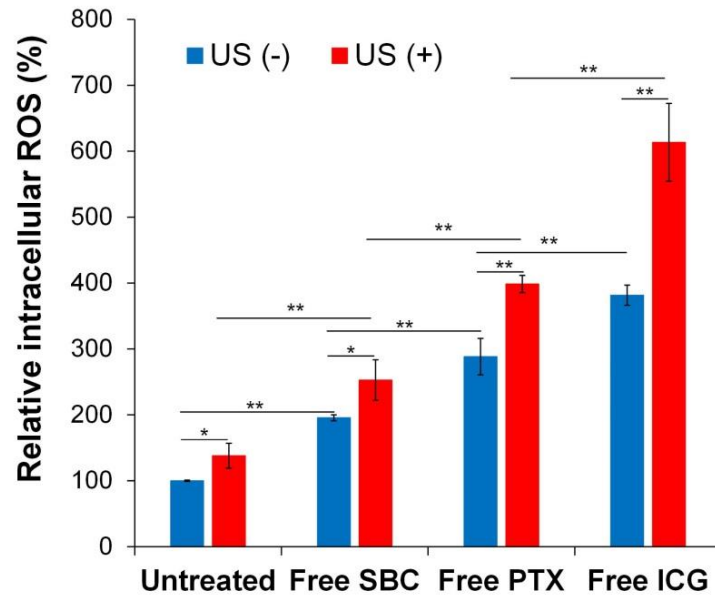

**Figure S8.** Relative intracellular ROS levels of MCF-7 cells treated with free SBC (4 nM), free PTX (10  $\mu$ g/mL), and free ICG (28  $\mu$ g/mL) before and after US irradiation (1 MHz, 0.3 W/cm<sup>2</sup>, 1 min) (\* $p$  < 0.05, \*\* $p$  < 0.01,  $n$  = 3).

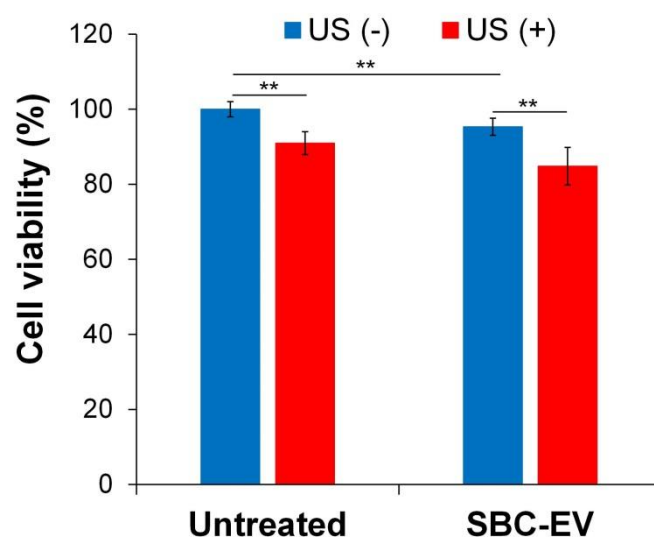

**Figure S9.** Viabilities of MCF-7 cells treated with SBC-EV at 4 nM of SBC concentration before and after US irradiation ( $0.3 \text{ W/cm}^2$ , 1 min) (\*\* $p < 0.01$ ,  $n = 3$ ).

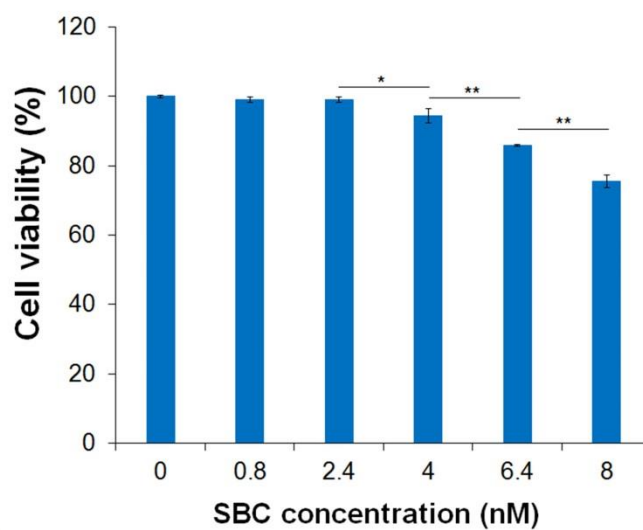

**Figure S10.** Viabilities of MCF-7 cells treated with SBC-EV at different concentrations of SBC (\* $p < 0.05$ , \*\* $p < 0.01$ ,  $n = 3$ ).

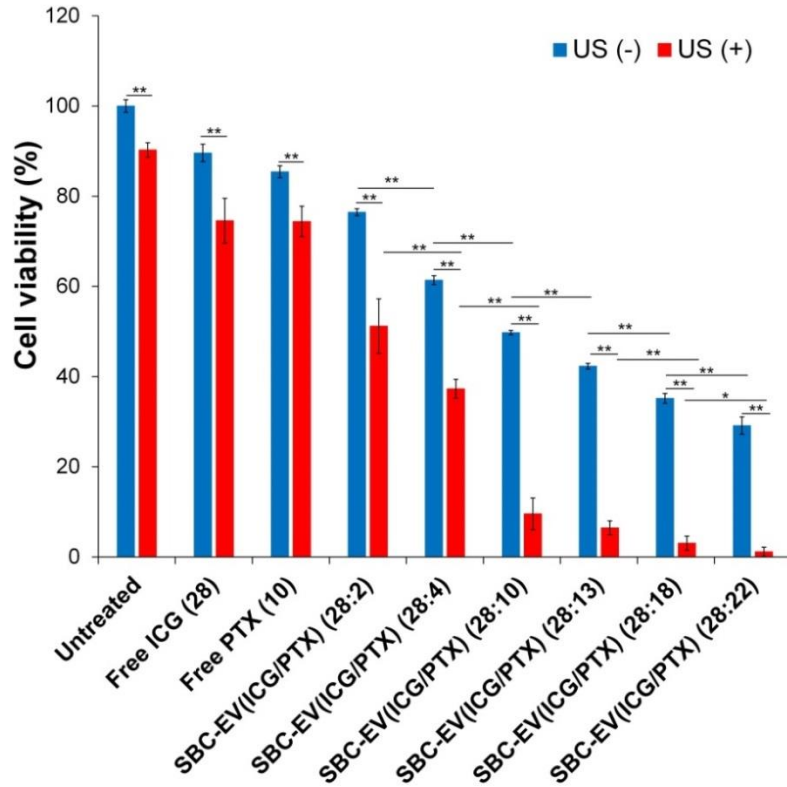

**Figure S11.** Viabilities of MCF-7 cells treated with various SBC-EV(ICG/PTX) at different concentrations of ICG and PTX before and after US irradiation ( $0.3 \text{ W/cm}^2$ , 1 min). The number indicates concentrations ( $\mu\text{g/mL}$ ) of ICG and PTX in the SBC-EV(ICG/PTX) (\* $p < 0.05$ , \*\* $p < 0.01$ ,  $n = 3$ ).

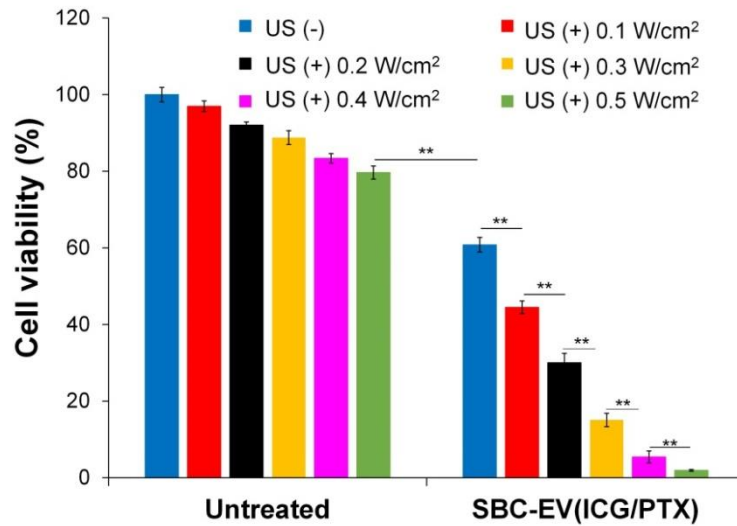

**Figure S12.** Viabilities of MCF-7 cells treated with SBC-EV(ICG/PTX) after irradiation with various intensities of US (\*\* $p < 0.01$ ,  $n = 3$ ).

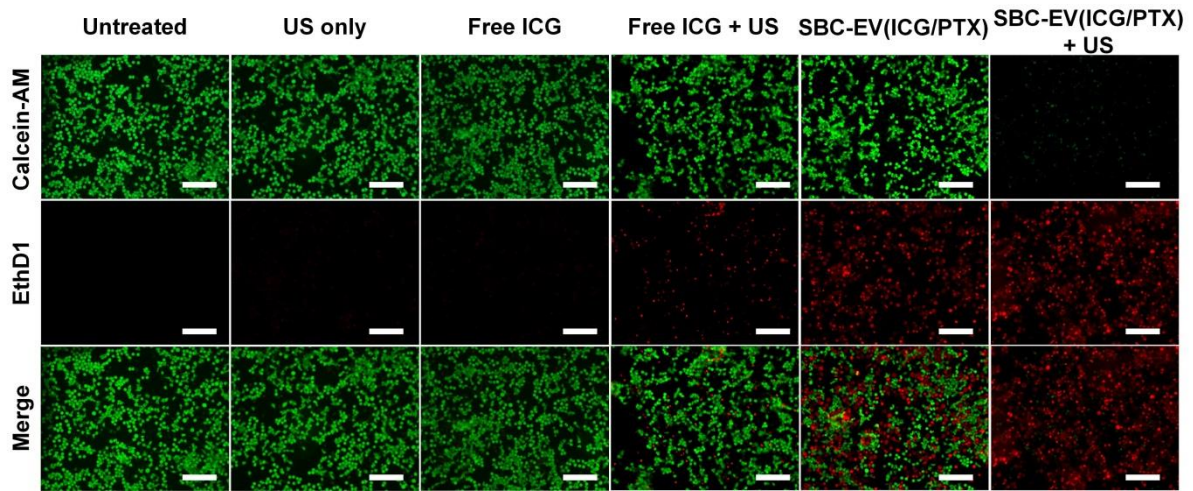

**Figure S13.** Live (green color) and dead (red color) cell staining of MCF-7 cells treated with free ICG and SBC-EV(ICG/PTX) before and after after US irradiation ( $0.3 \text{ W/cm}^2$ , 1 min). Scale bars indicate 200  $\mu\text{m}$ .

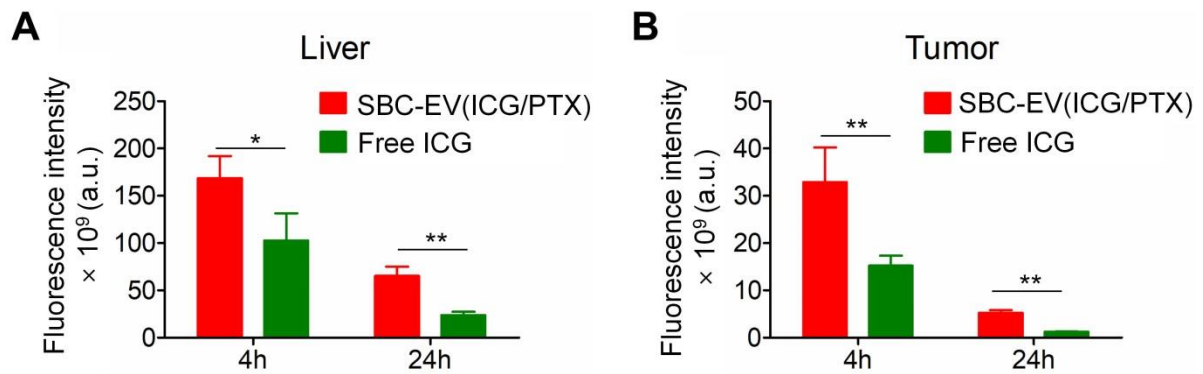

**Figure S14.** Quantitation of ICG from *ex vivo* imaging of liver (A) and tumor (B) at 4 h and 24 h-post i.v. administration of free ICG and SBC-EV(ICG/PTX) (\* $p < 0.05$ , \*\* $p < 0.01$ ).

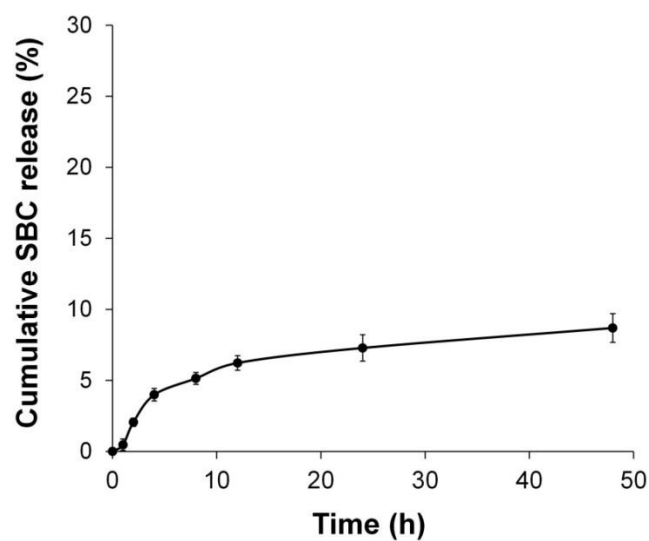

**Figure S15.** Release profiles of SBC from SBC-EV(ICG/PTX) at high salt concentrations (i.e., 260 mM KCl aqueous solution) mimicking in vivo conditions.

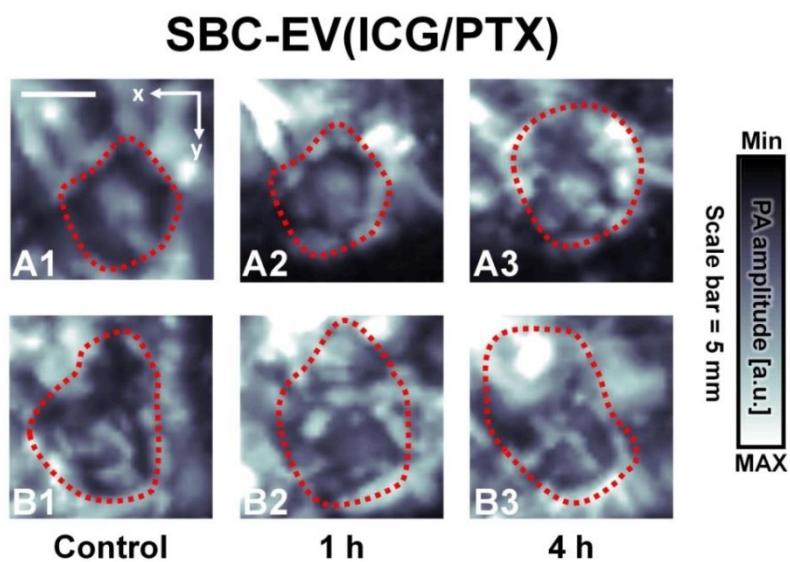

**Figure S16.** *In vivo* PA MAP images of tumors of MCF-7-bearing mice (A and B) at different time intervals after i.v. injection of SBC-EV(ICG/PTX). (MAP: maximum amplitude projection). Scale bar indicates 5 mm. The red circles in the images indicate tumor regions.

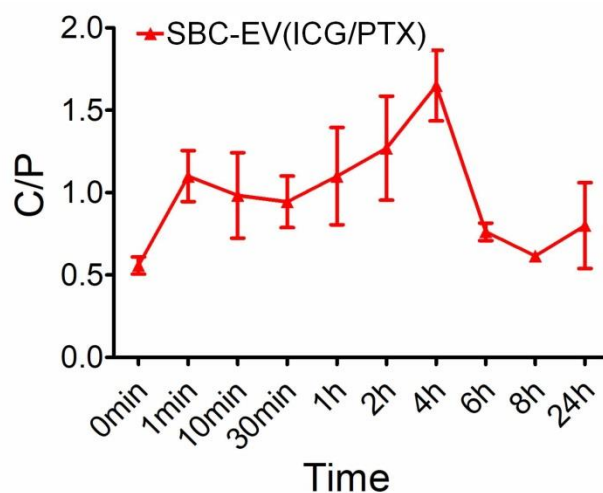

**Figure S17.** The time course ratios of the fluorescence intensity in the tumor core area to the peritumoral tissue area (C/P) in the SBC-EV(ICG/PTX)-treated mice as a function of time, determined by using IVIS.

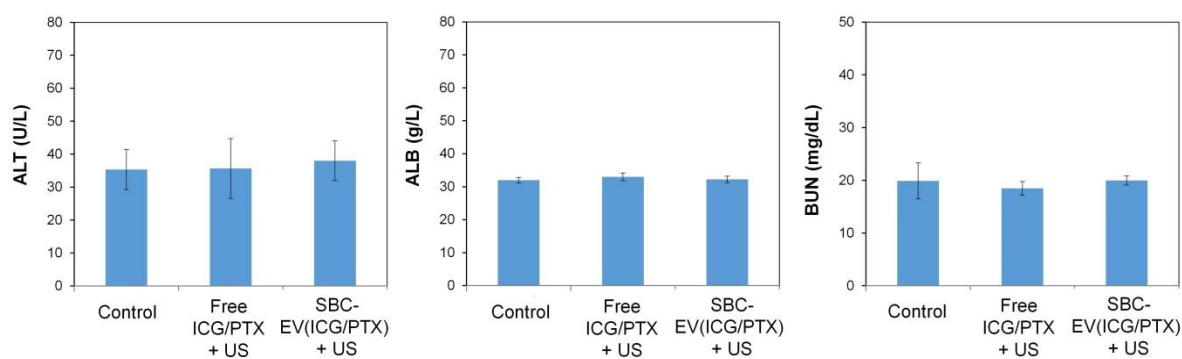

**Figure S18.** Serum biochemistry results obtained from mice injected with free ICG/PTX and SBC-EV(ICG/PTX) at day 14 after i.v. injection. The tumors of mice were irradiated with 3 min of US (1 MHz, 0.5 W/cm<sup>2</sup>) at 4 h post-injection. These results show mean and standard deviations of alanine aminotransferase (ALT), albumin (ALB), and blood urea nitrogen (BUN).
